# Supplementary material
Source: MDPI journal article supplement (doi:10.3390/zoonoticdis6010007)
Supplement: s1 [file zoonoticdis-4051838-supplementary.pdf › zoonoticdis-4051838-supplementary.pdf]

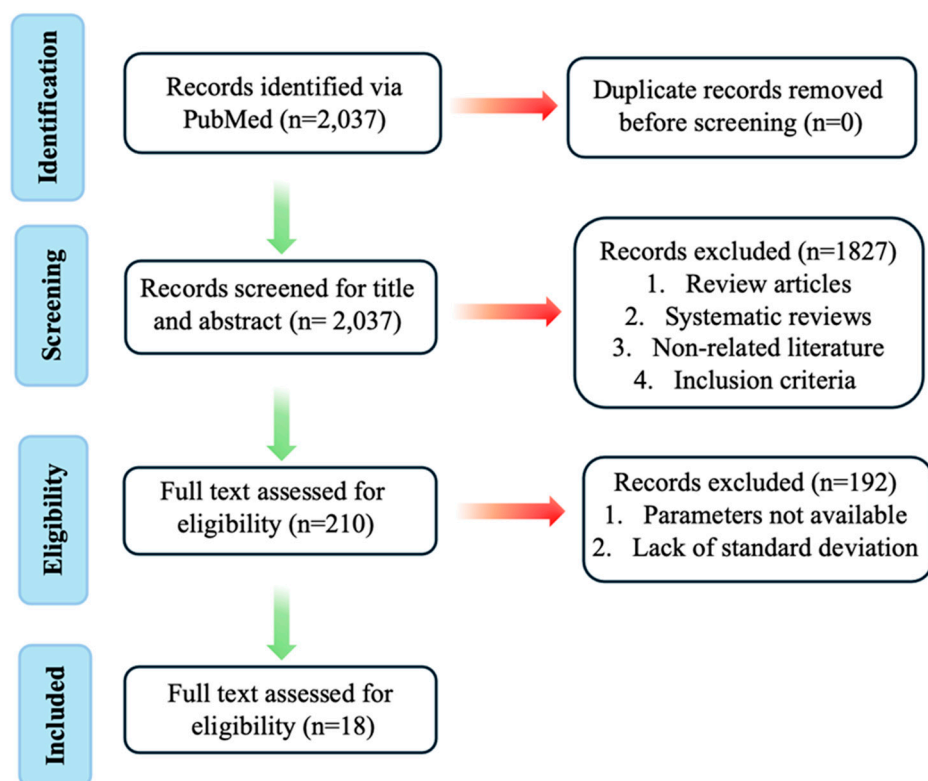

**Figure S1.** Flow chart of study selection for the systematic review and meta-analysis, showing the number of records identified, screened, excluded, and included at each stage.

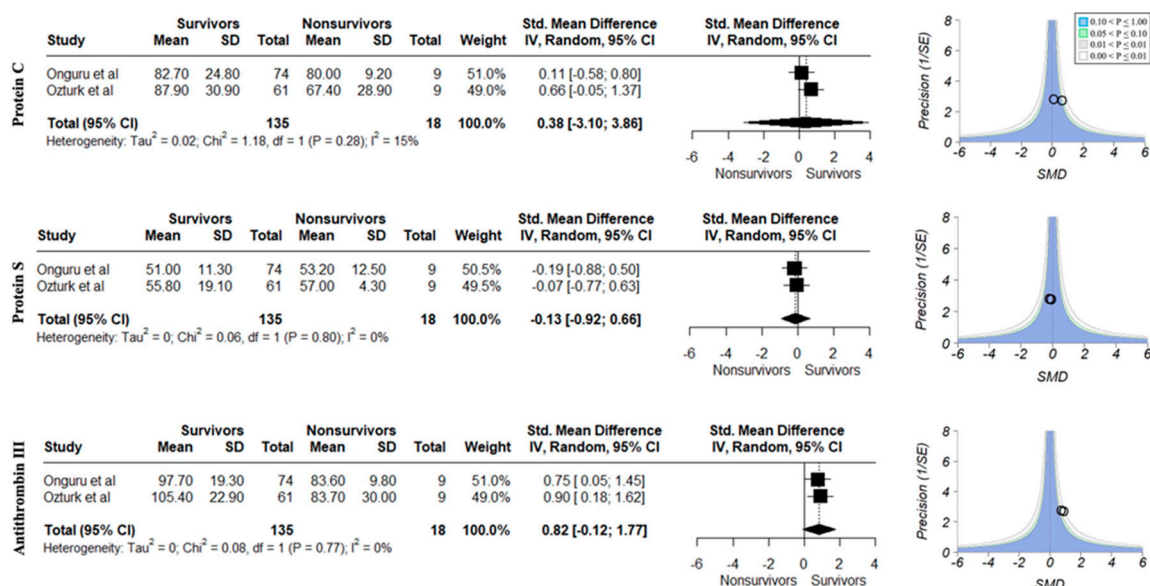

**Figure S2.** Effect of CCHF on anticoagulant proteins C, S, and antithrombin III. The figure includes forest plots showing study-specific and pooled effect estimates, alongside contour-enhanced funnel plots for each protein to assess potential asymmetry and publication bias. Data were analyzed using R (meta and metafor packages).

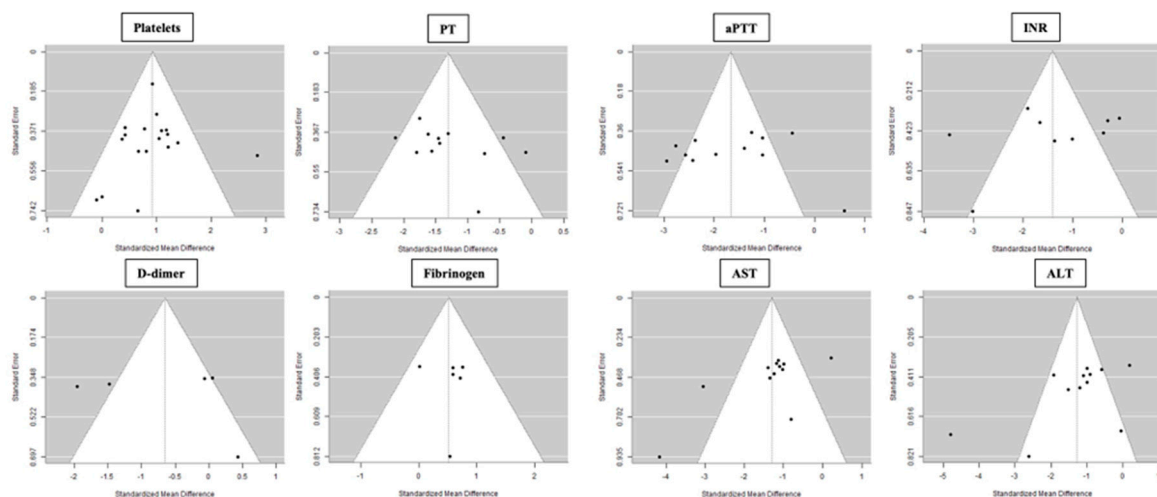

**Figure S3.** Funnel plot showing the distribution of studies to assess potential asymmetry indicative of publication bias. Data were analyzed using R (meta and metafor packages).

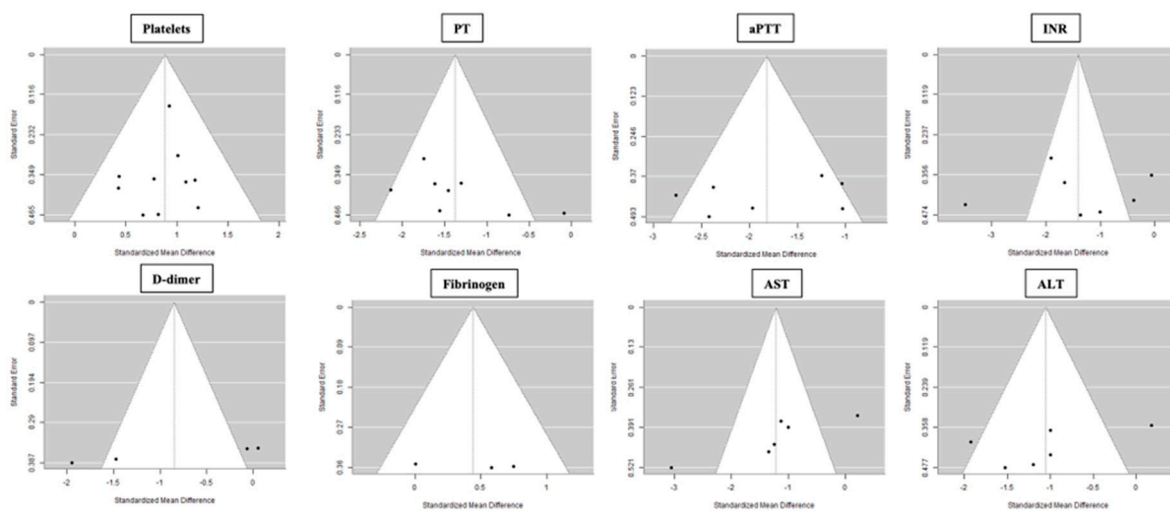

**Figure S4.** Funnel plot showing the distribution of studies with sample size >50 to assess potential asymmetry indicative of publication bias. Data were analyzed using R (meta and metafor packages).
